# Supplementary material
Source: Springer Nature journal article supplement (http://www.springermedizin.de/resource/supplementary/12943_2013_1202_MOESM1_ESM.pdf/9552368)

**A**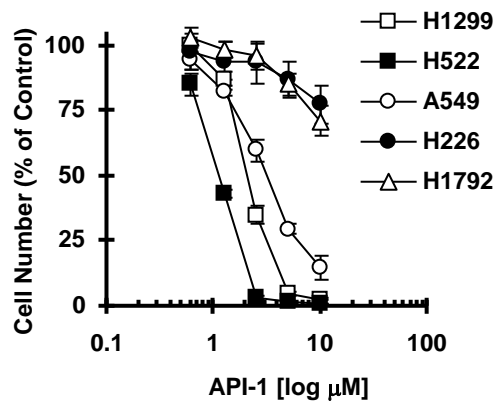**B**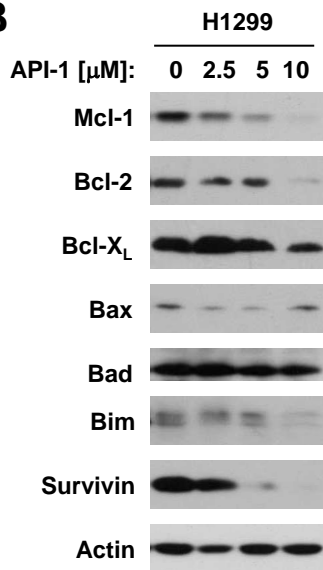**C**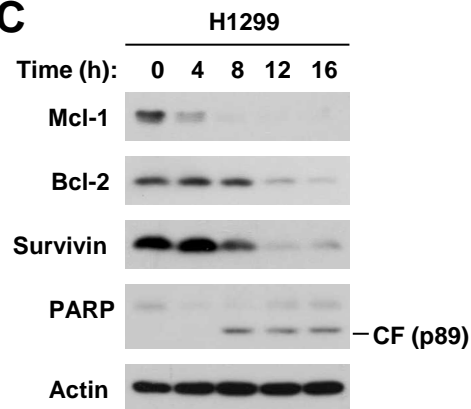**D**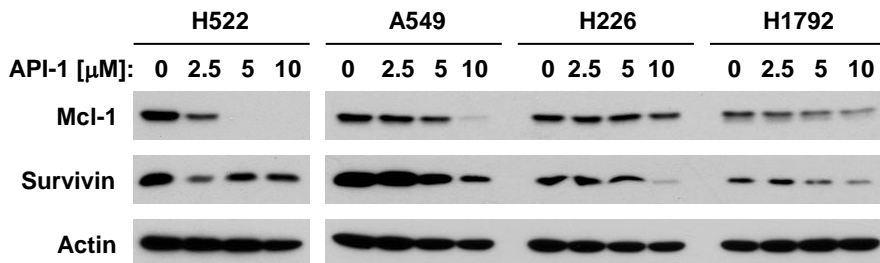

Supplement: MOESM1 [file 9552368]
